# Supplementary material for: Therapeutic Aqueous Humor Concentrations of Latanoprost Attained in Rats by Administration in a Very-High-Molecular-Weight Hyaluronic Acid Eye Drop
Source: MDPI journal article supplement (doi:10.3390/pharmaceutics16040523), 2024-04-09
Supplement: s1 [file s1]

**A Male**

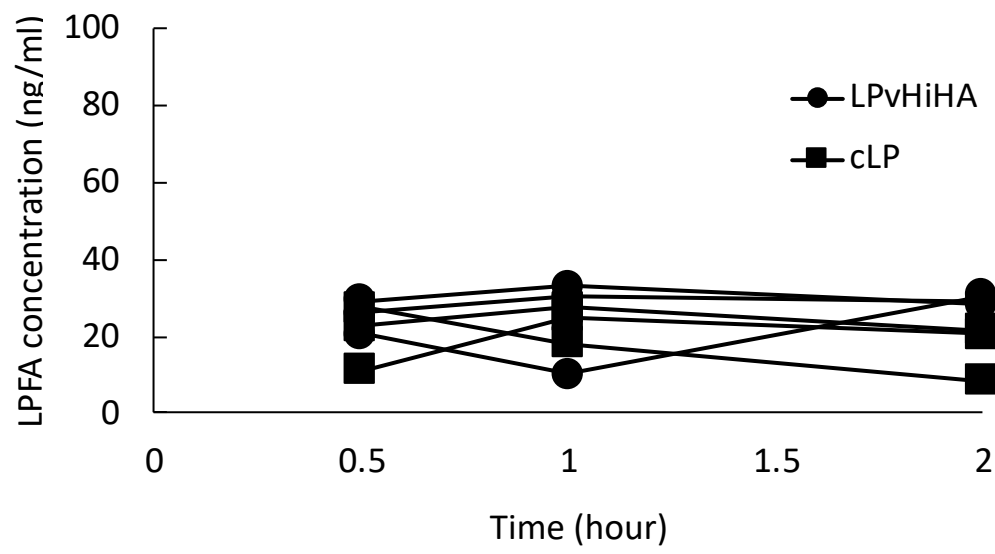

**B Female**

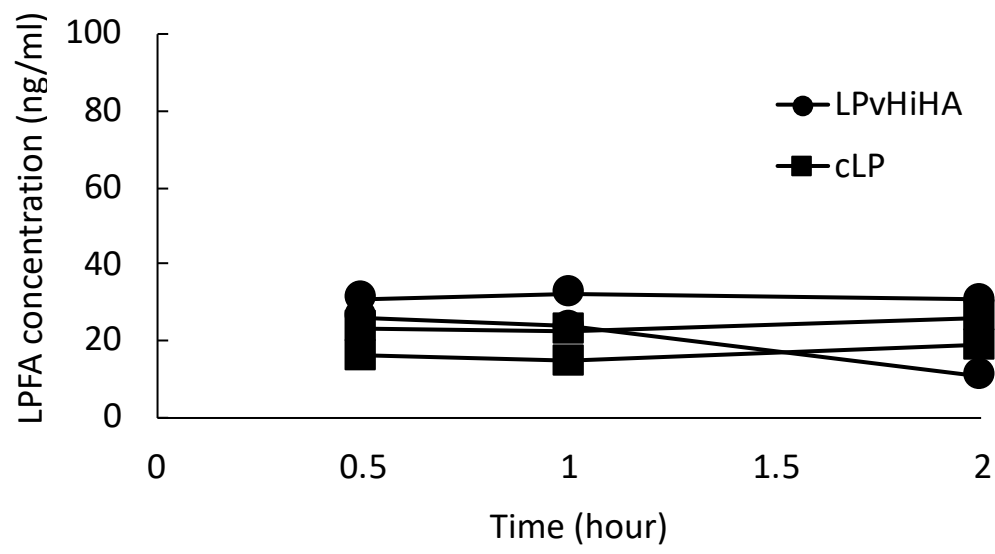

**Supplemental Figure S1:** The time-dependent changes in LPFA concentration in the rat AH of the untreated contralateral eyes.

**Supplemental Table S1.**

Mesurement data of Latanoplost free acid (LPFA) concentration (ng/ml) in aqueous humor (AH)  
of contralateral non-treated eyes as a quality control.

| Time (h) | Quality control |       |       |       |       |       |        |       |       |       |
|----------|-----------------|-------|-------|-------|-------|-------|--------|-------|-------|-------|
|          | Male            |       |       |       |       |       | Female |       |       |       |
|          | #1              | #2    | #3    | #4    | #5    | #6    | #1     | #2    | #3    | #4    |
| 0.5      | 26.13           | 29.30 | 20.41 | 11.11 | 22.69 | 27.55 | 31.17  | 26.13 | 16.09 | 23.50 |
| 1        | 30.09           | 33.15 | 9.99  | 25.00 | 27.31 | 18.20 | 32.57  | 23.92 | 14.99 | 22.89 |
| 2        | 29.30           | 28.29 | 30.62 | 20.59 | 21.71 | 8.38  | 30.62  | 10.91 | 19.02 | 26.36 |
